# Supplementary material for: Extracting and Evaluating Urban Entities in China from 2000 to 2020 Based on SNPP-VIIRS-like Data
Source: MDPI journal article supplement (doi:10.3390/rs15184632), 2023-09-21
Supplement: s1 [file s1]

## Supplementary Figures

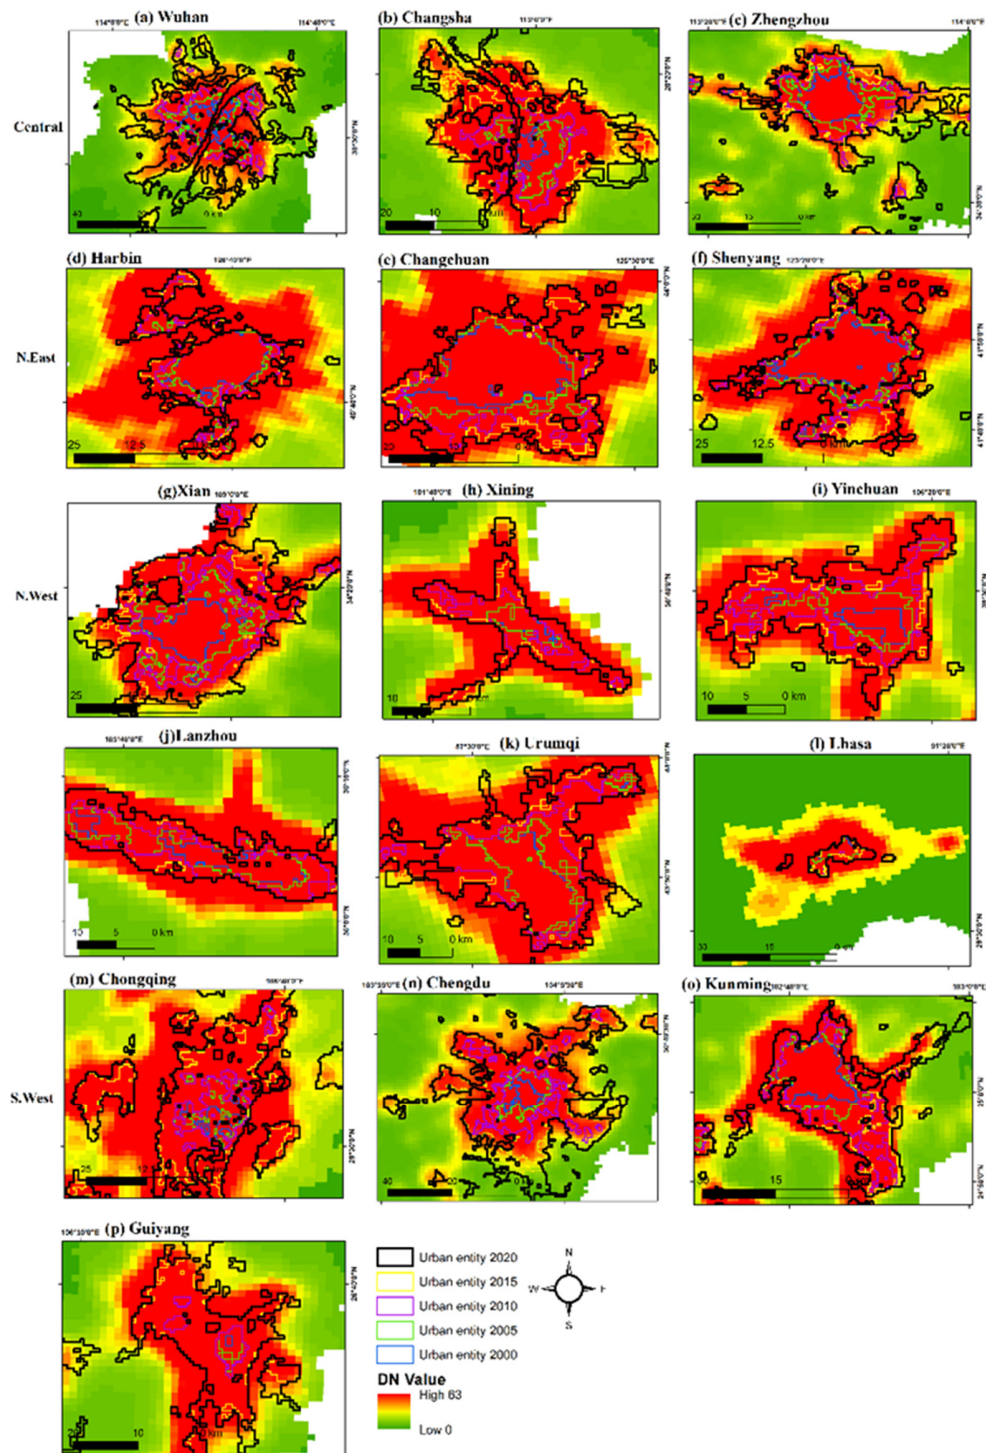

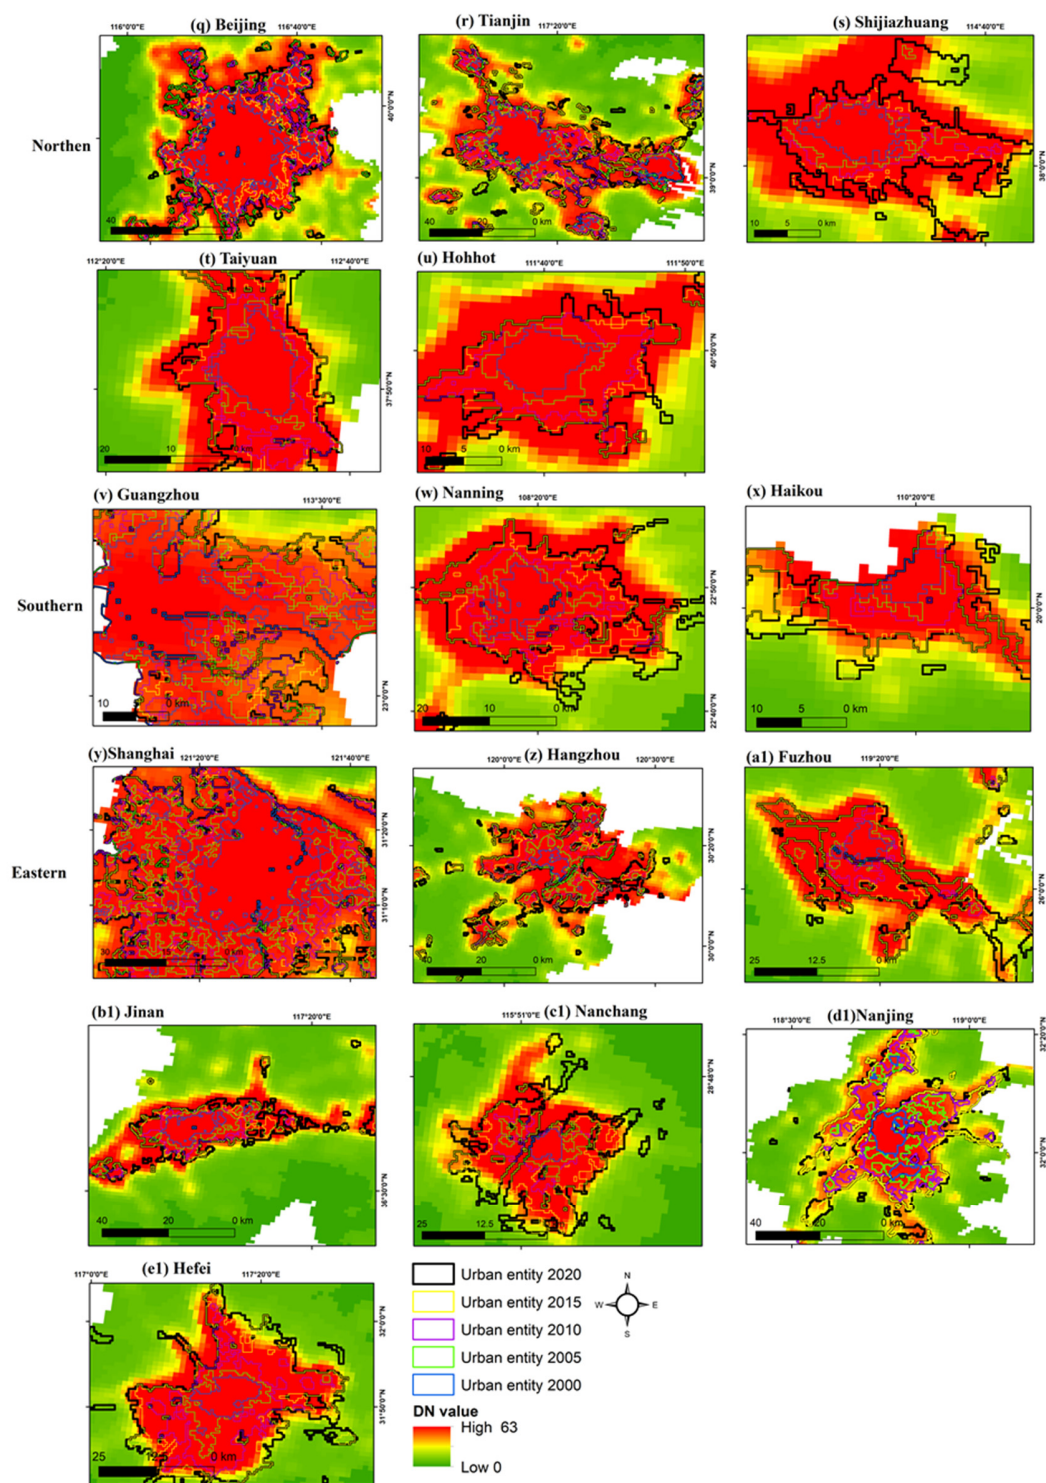

Figure S1. Expansion of urban entities of 31 provincial capitals in China 2000-2020.



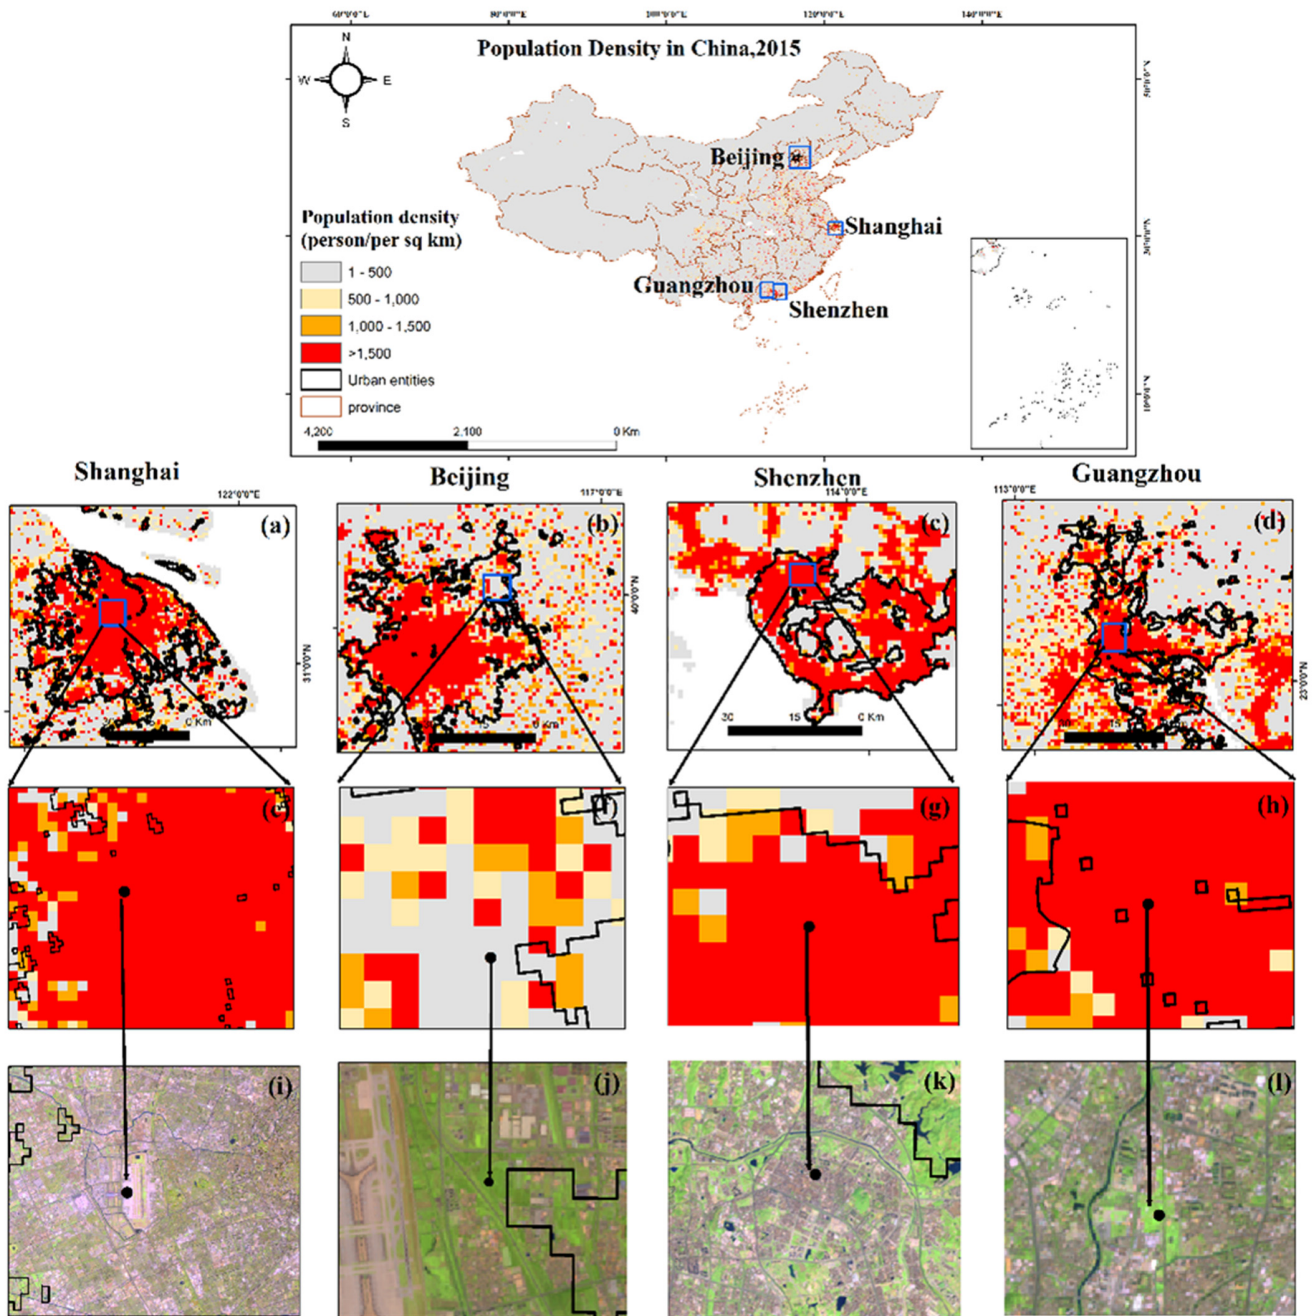

**Figure S2.** Extracted urban entities (a) Shanghai; (b) Beijing; (c) Shenzhen; (d) Guangzhou with LandScan product and Landsat8 images, 2015.

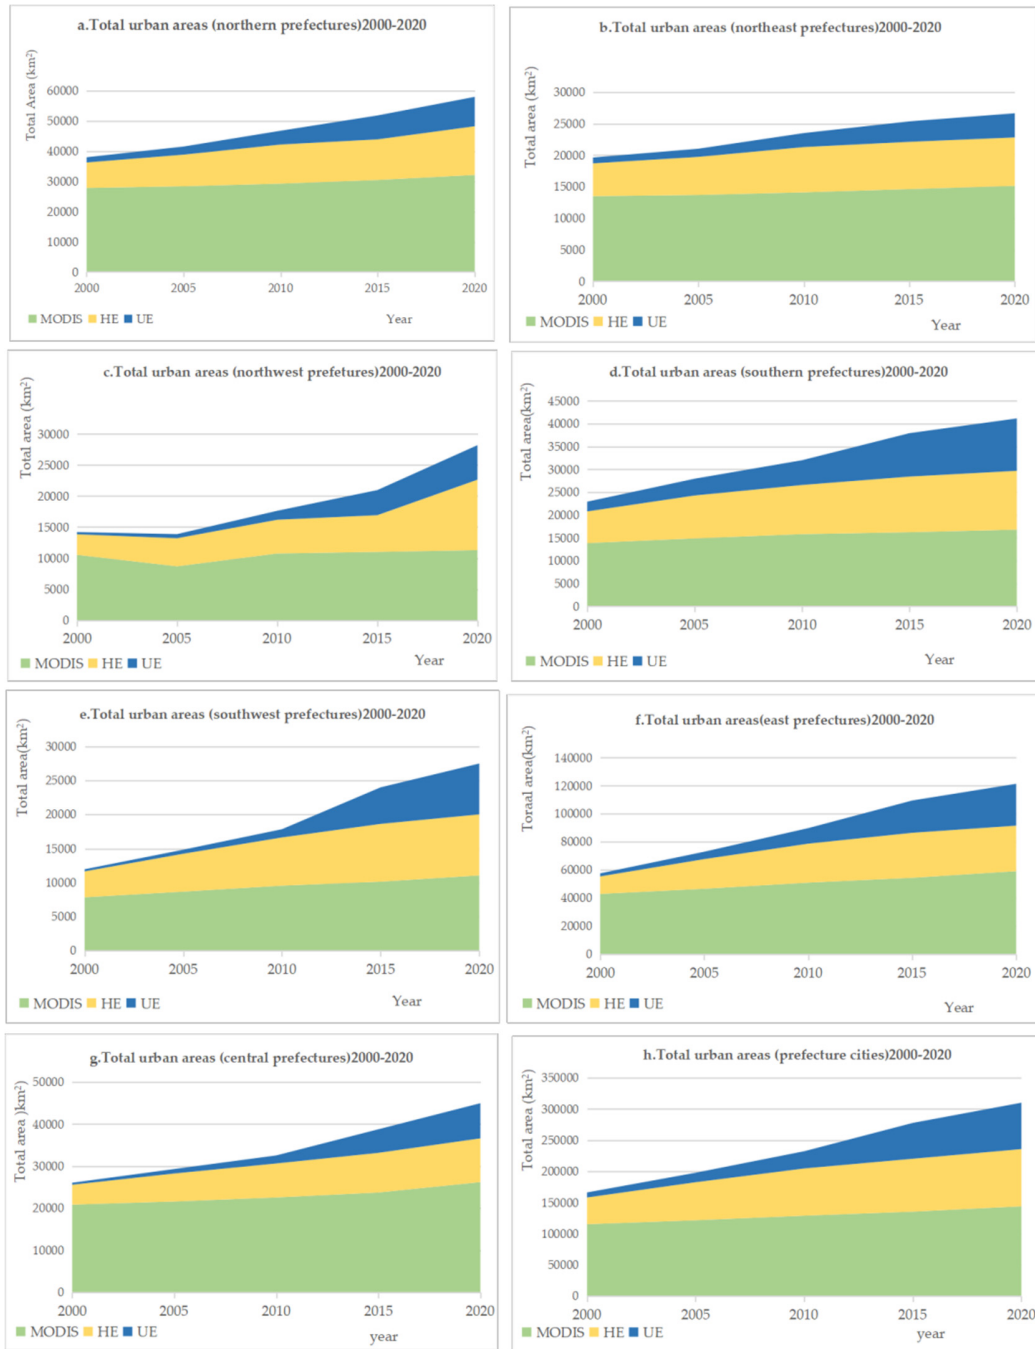

**Figure S3.** Comparison results of urban areas for UE, HE, MODIS on provincial, and, national levels, 2000-2020.



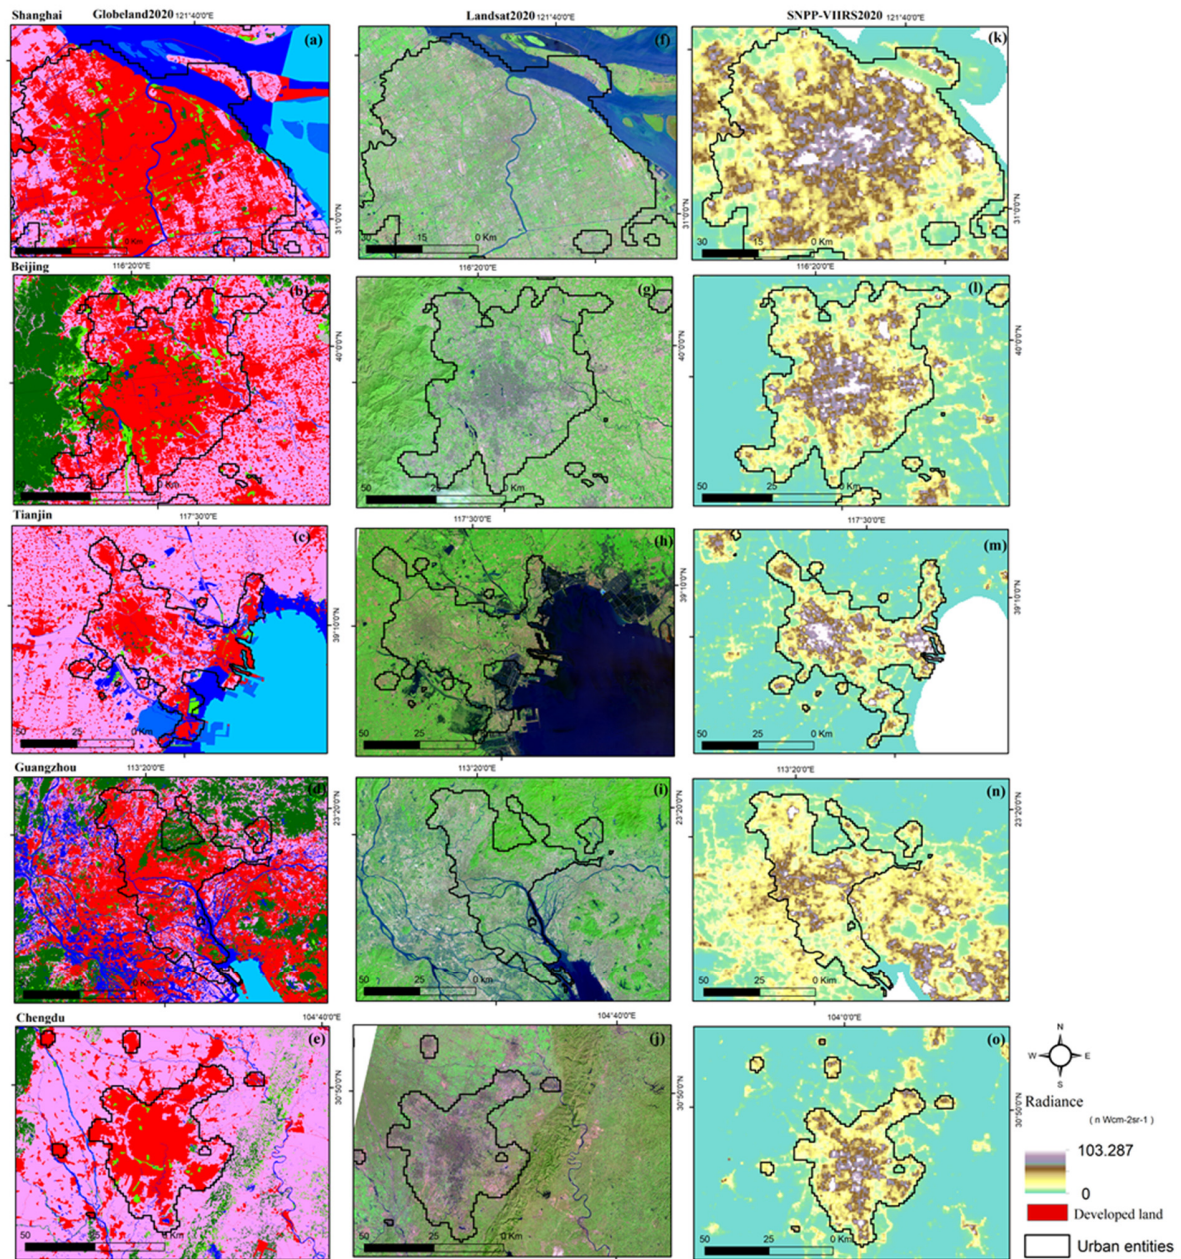

**Figure S4.** Visual differences of urban entities of five capitals in Globeland, Landsat8, and SNPP-VIIRS-like images in 2020.

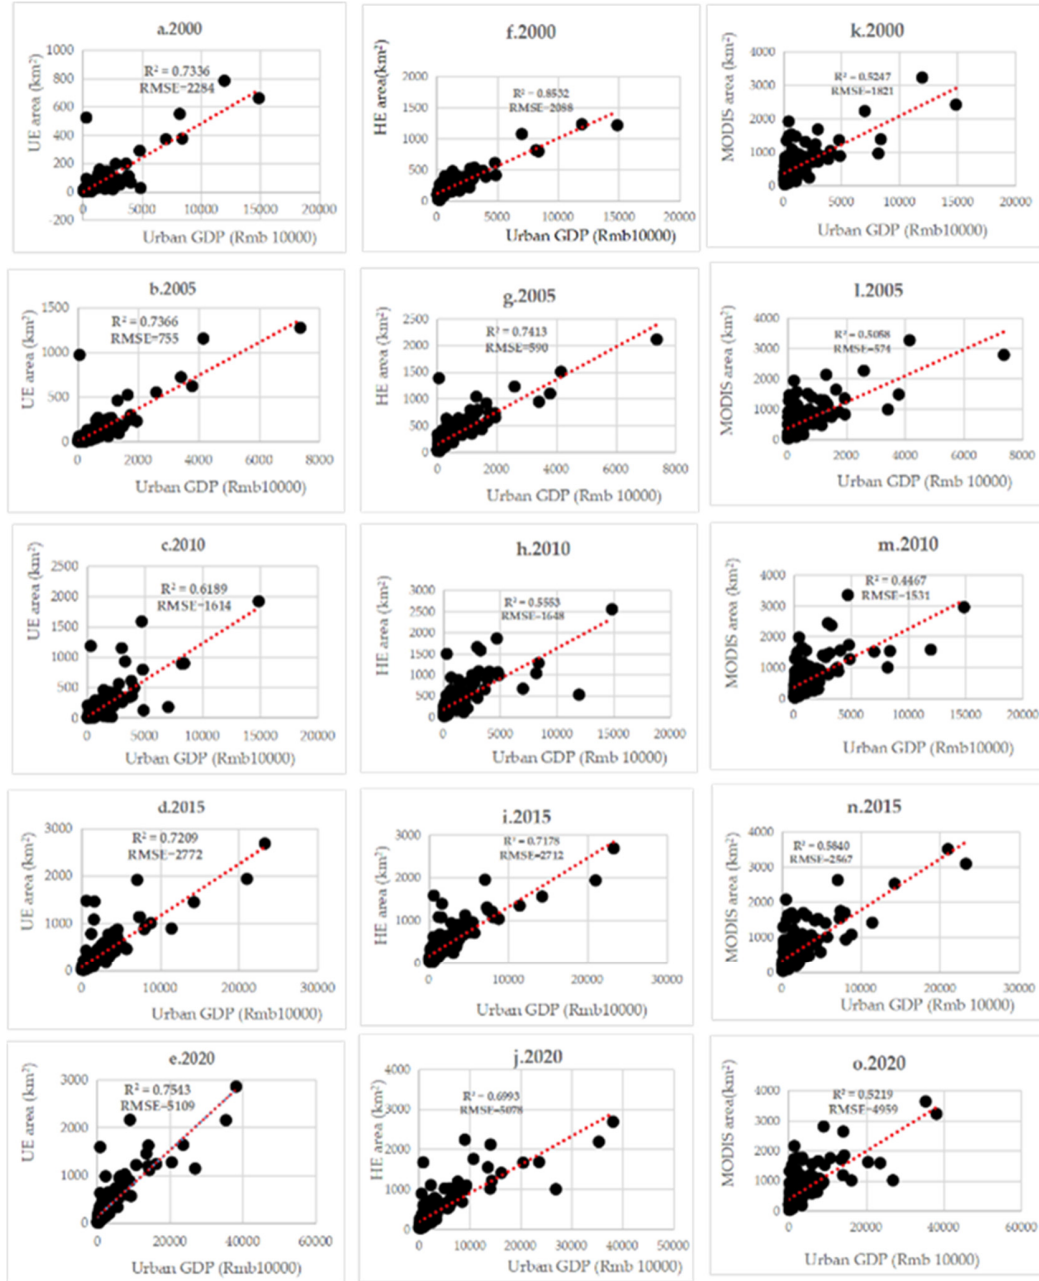

**Figure S5.** Regression results of total urban areas for UE, HE, MODIS, and urban GDP 2000-2020.
